# Supplementary material
Source: MDPI journal article supplement (https://www.mdpi.com/1424-8247/16/9/1321)
Supplement: s1 [file s1]

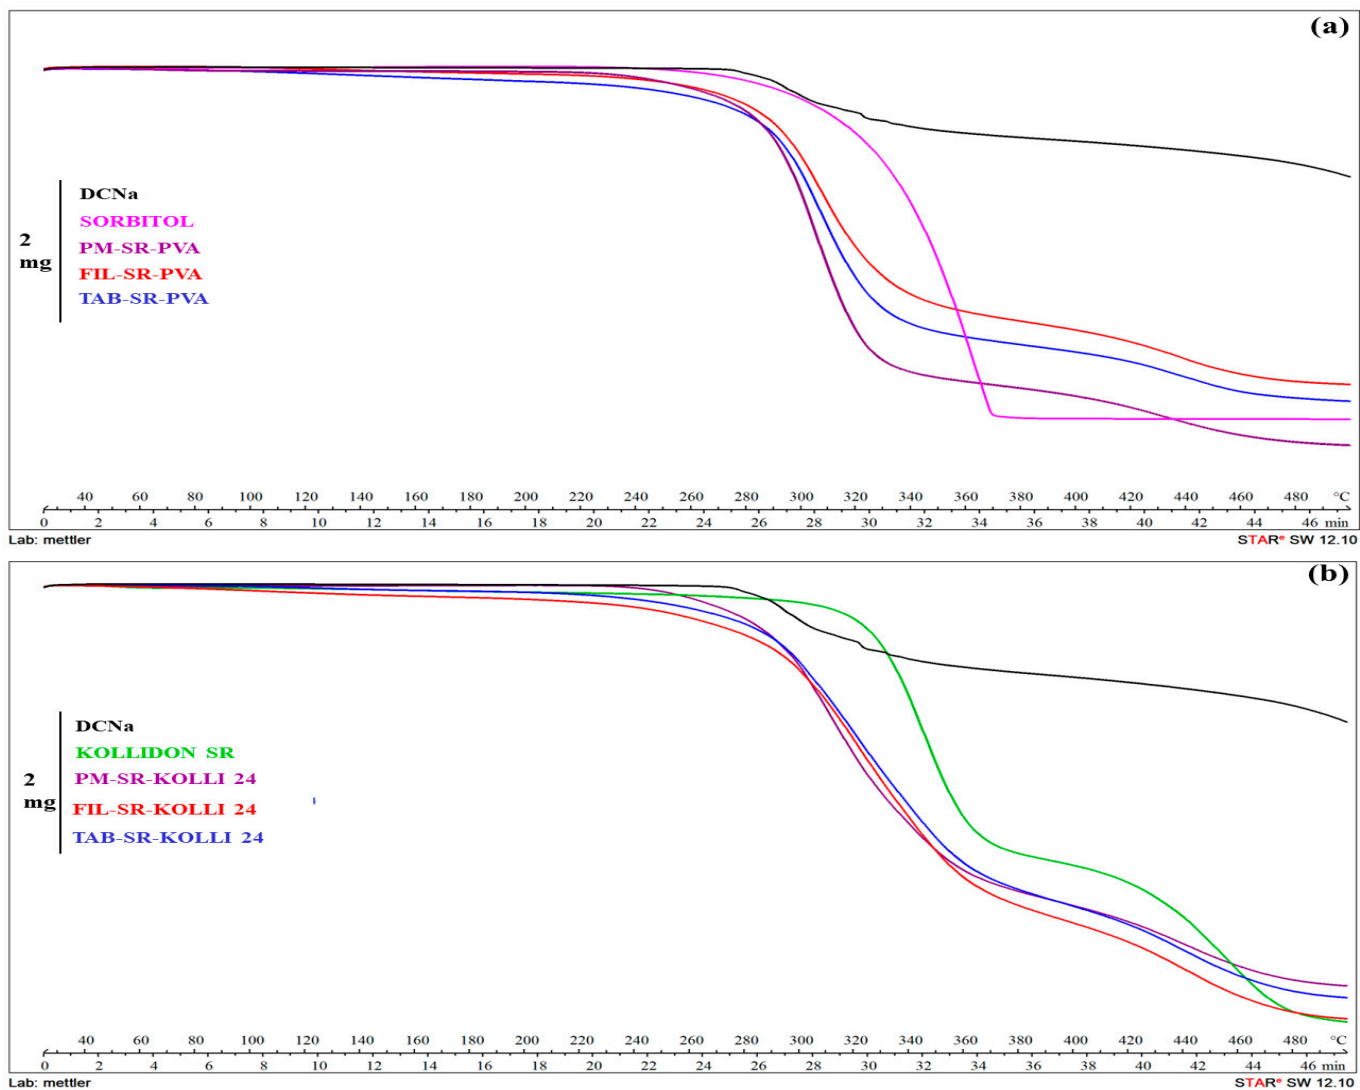

**Figure S1.** TGA profiles of materials along with physical mixtures, filaments and tablets consisting of (a) – PVA or (b) – combination of PVA and 24% w/w Kollidon® SR as matrix forming polymers.

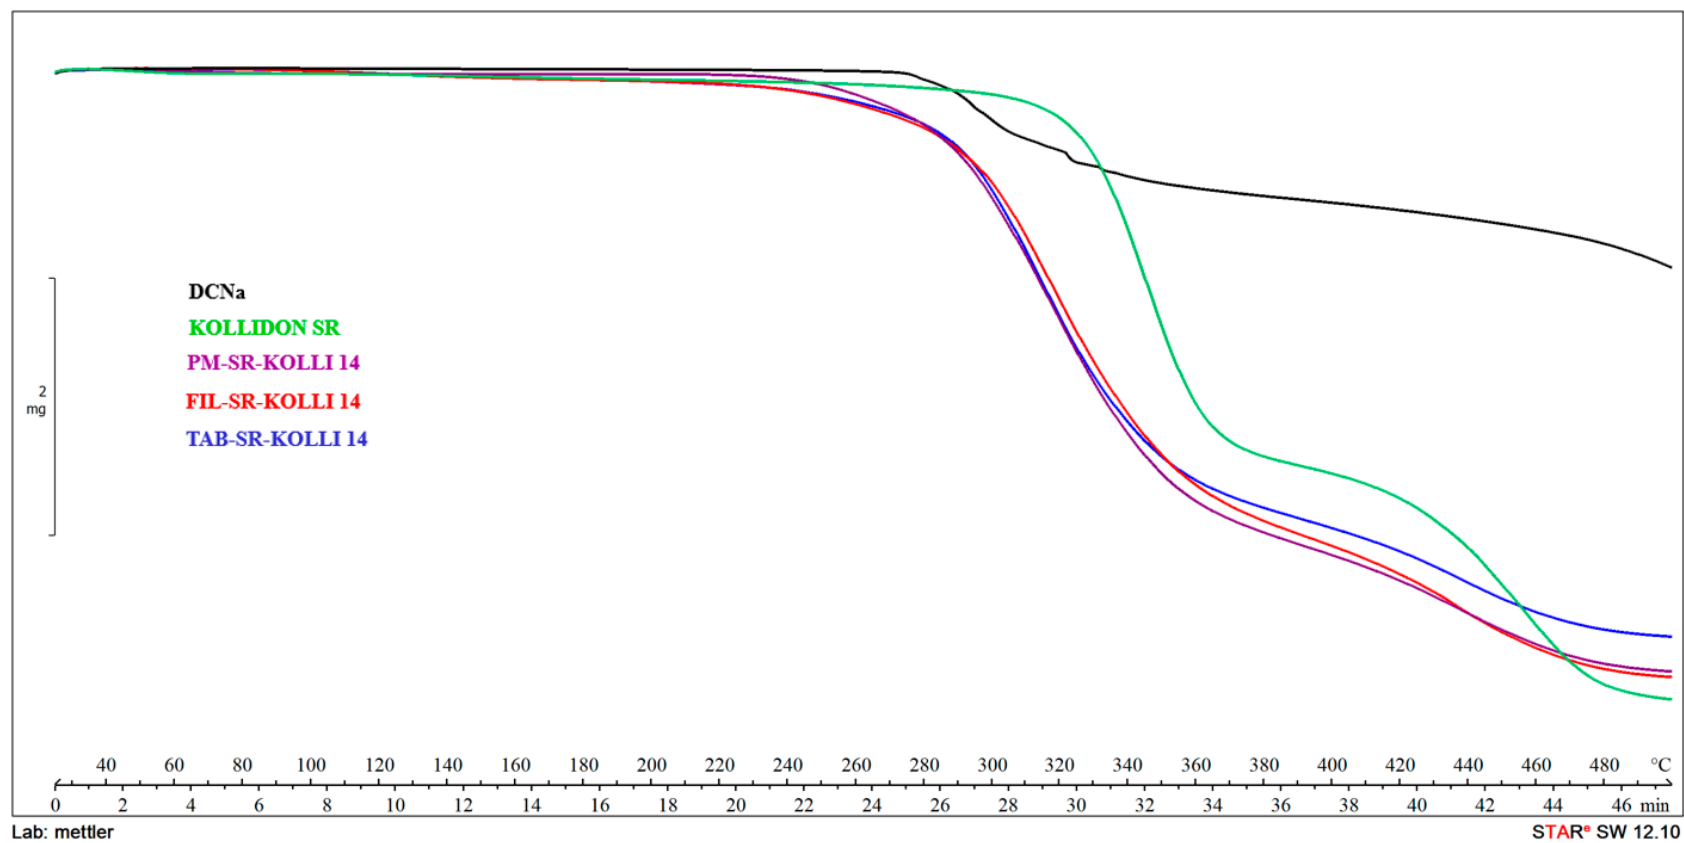

**Figure S2.** TGA profiles of raw materials along with physical mixtures, filaments, and tablets consisting of PVA and 14% w/w Kollidon® SR as matrix forming polymers.

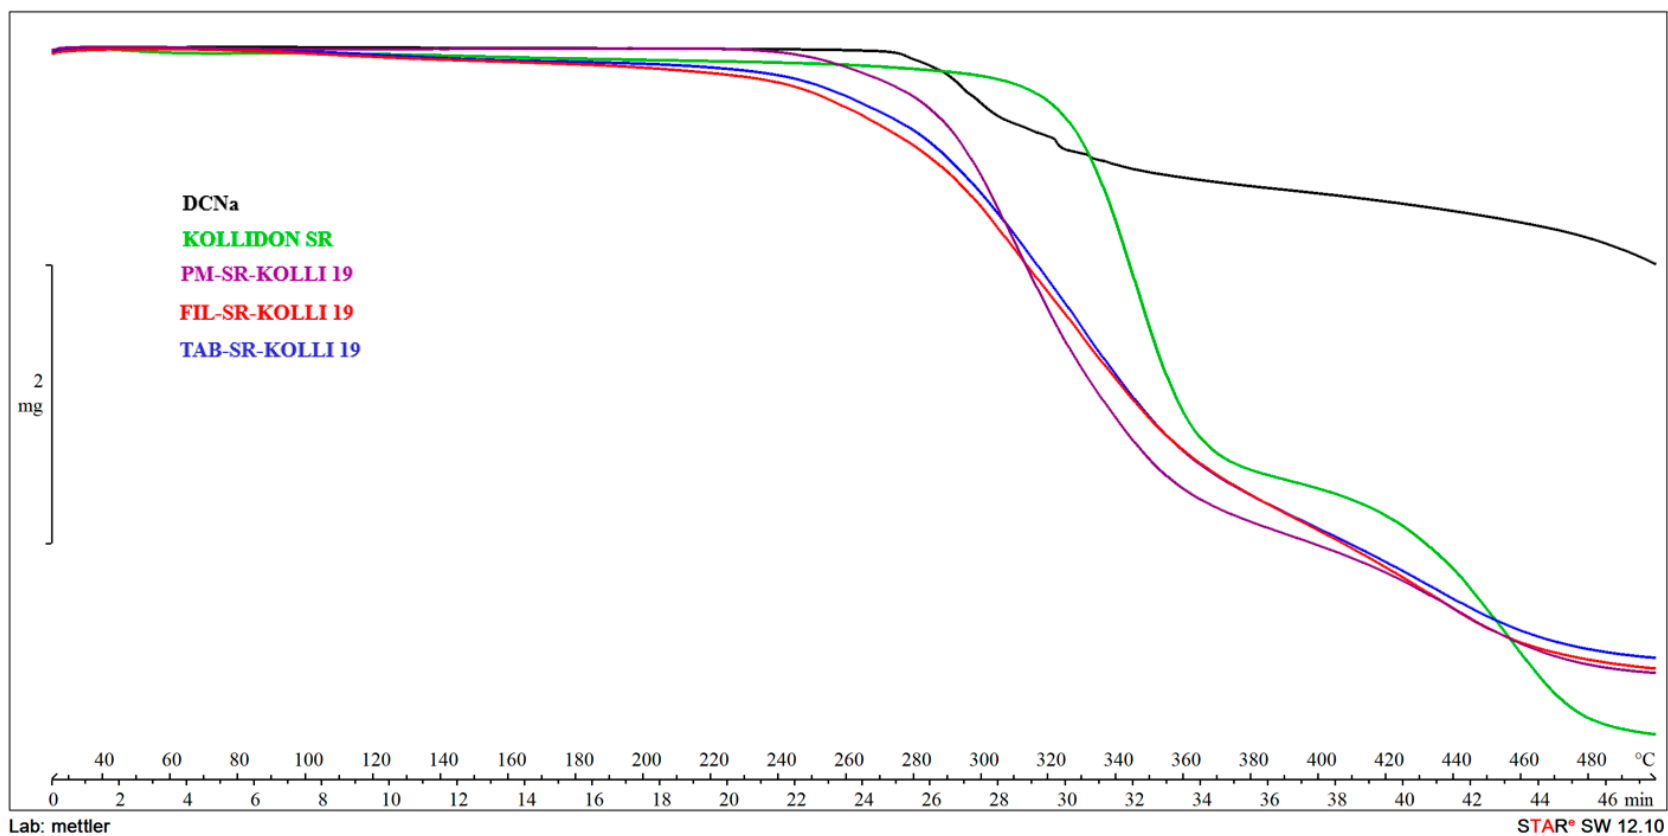

**Figure S3.** TGA profiles of raw materials along with physical mixtures, filaments, and tablets consisting of PVA and 19% w/w Kollidon® SR as matrix forming polymers.

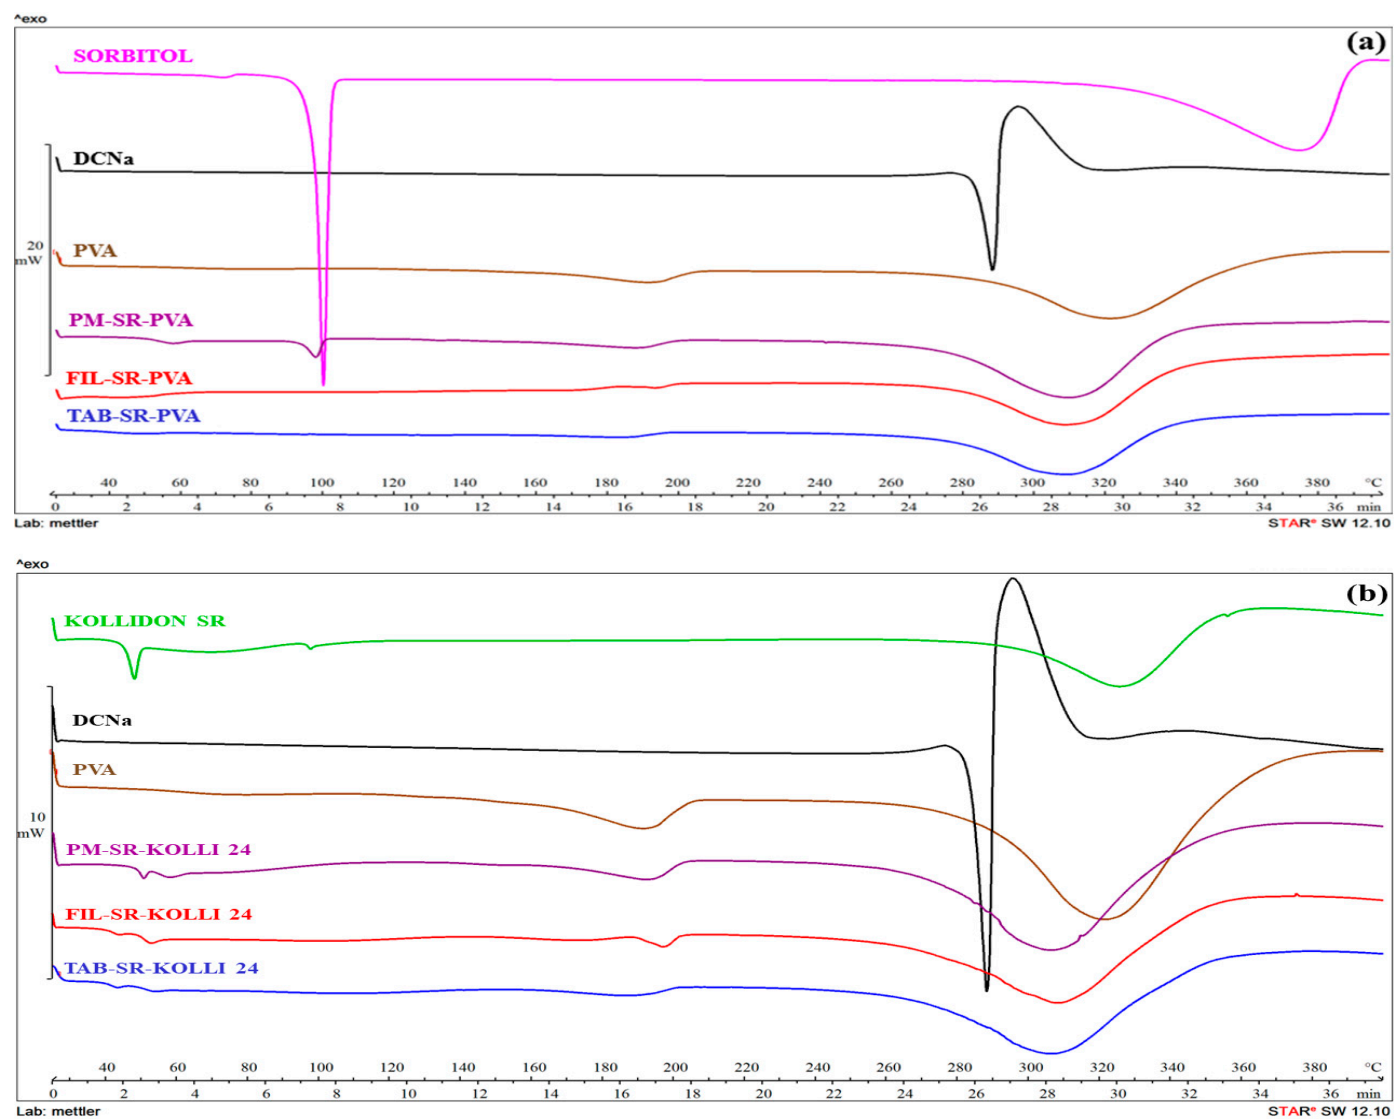

**Figure S4.** DSC curves of materials, physical mixtures, filaments, and tablets consisting of (a) – PVA or (b) – combination of PVA and 24% w/w Kollidon<sup>®</sup> SR as matrix forming polymers.

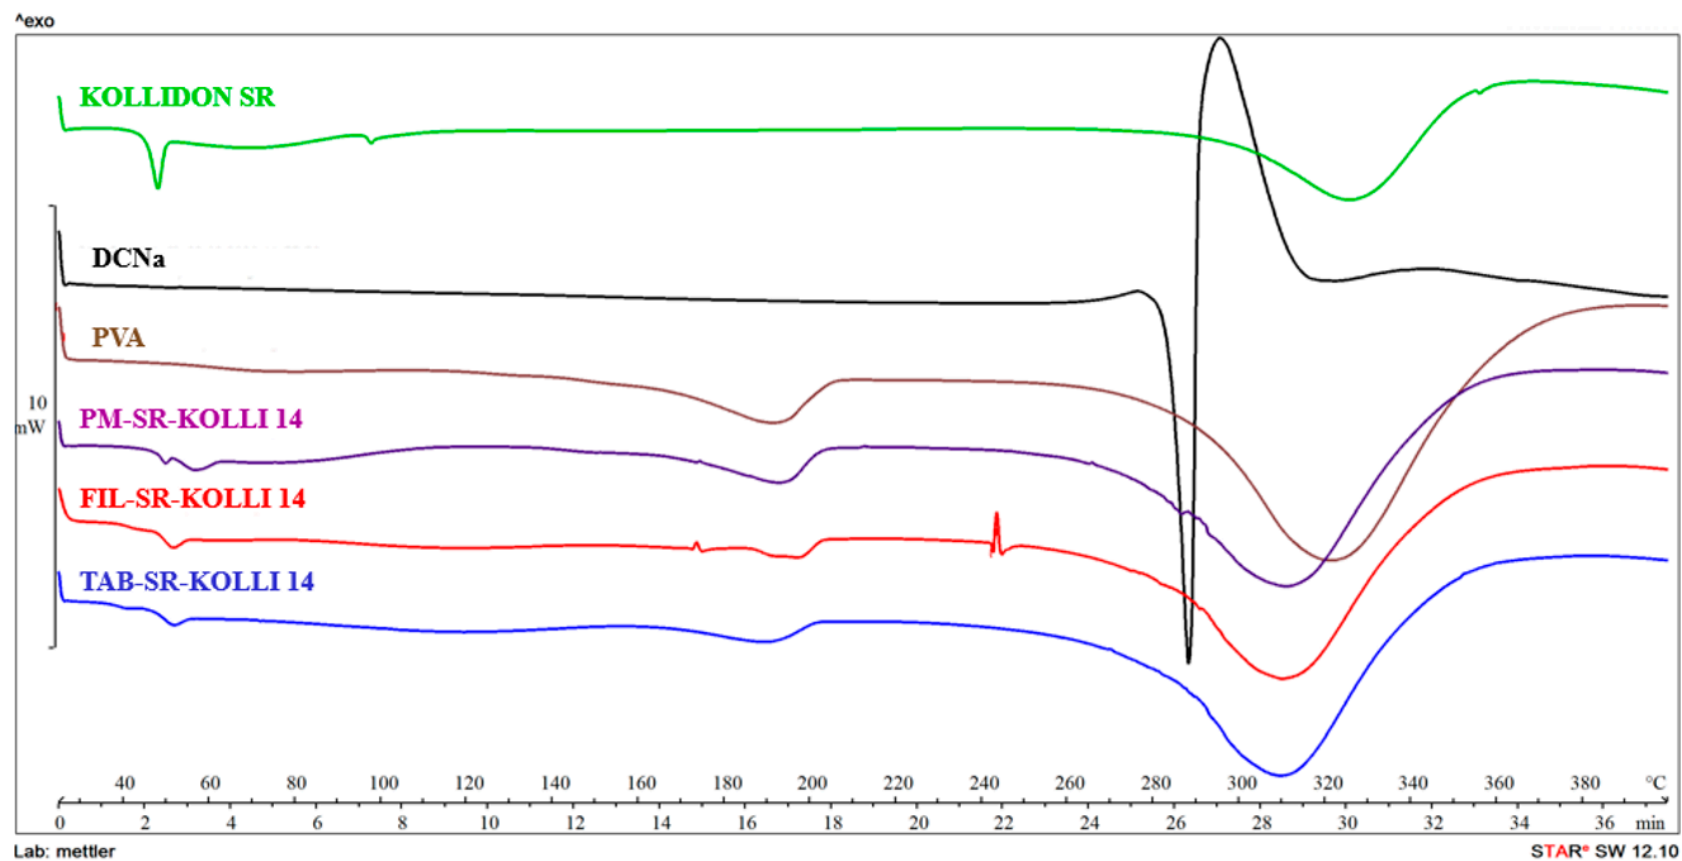

**Figure S5.** DSC curves of raw materials, physical mixtures, filaments, and tablets consisting of PVA and 14% w/w Kollidon® SR as matrix forming polymers.

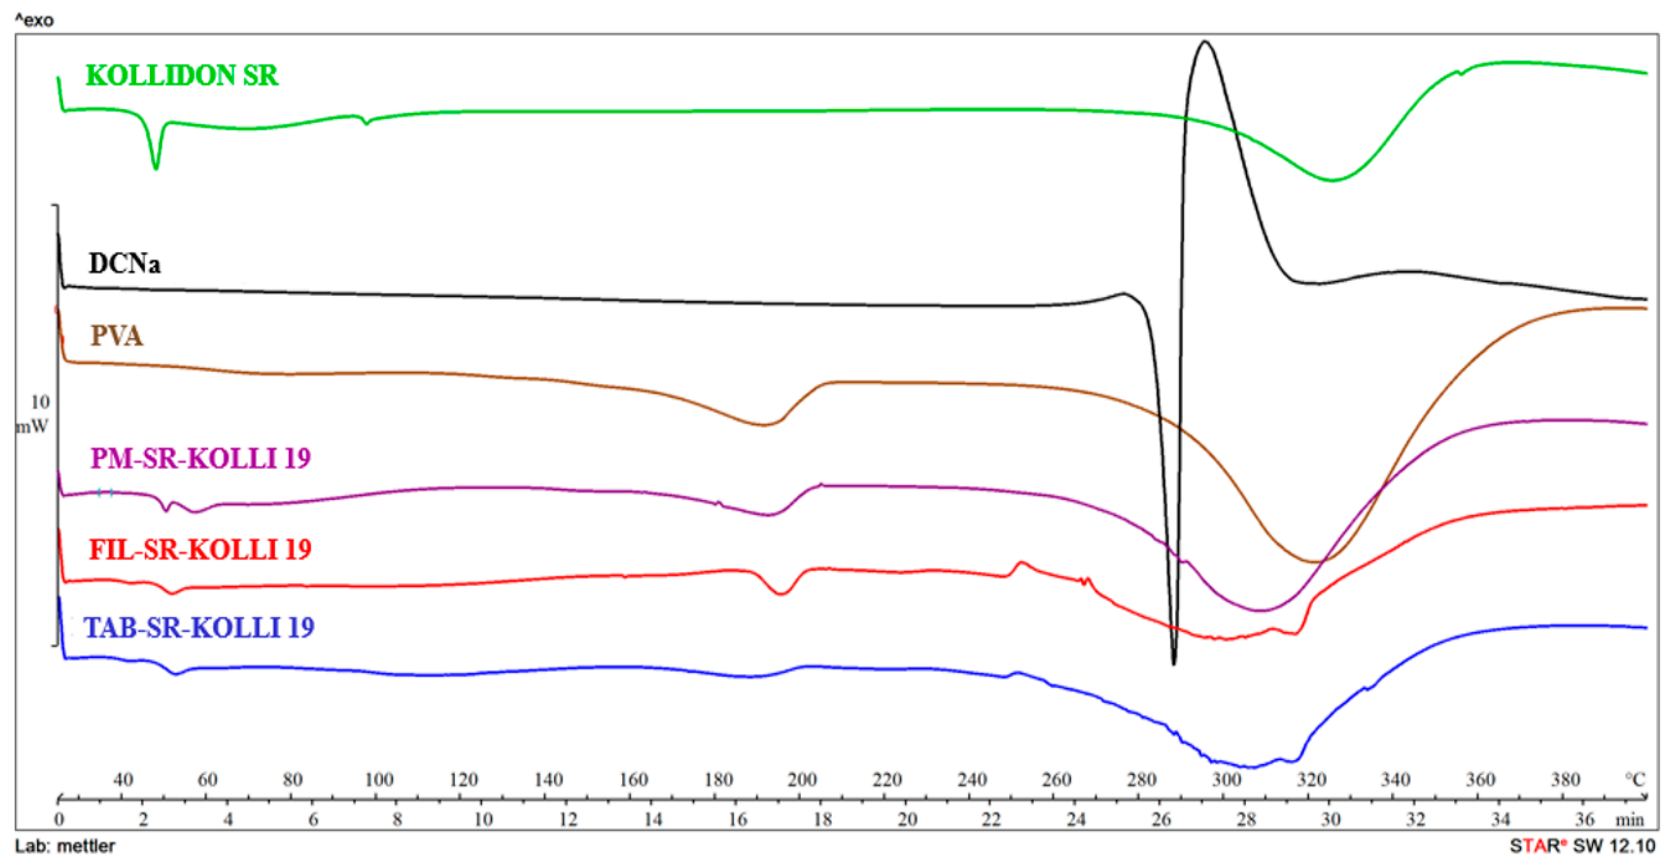

**Figure S6.** DSC curves of materials, physical mixtures, filaments, and tablets consisting of PVA and 19% w/w Kollidon® SR as matrix forming polymers.

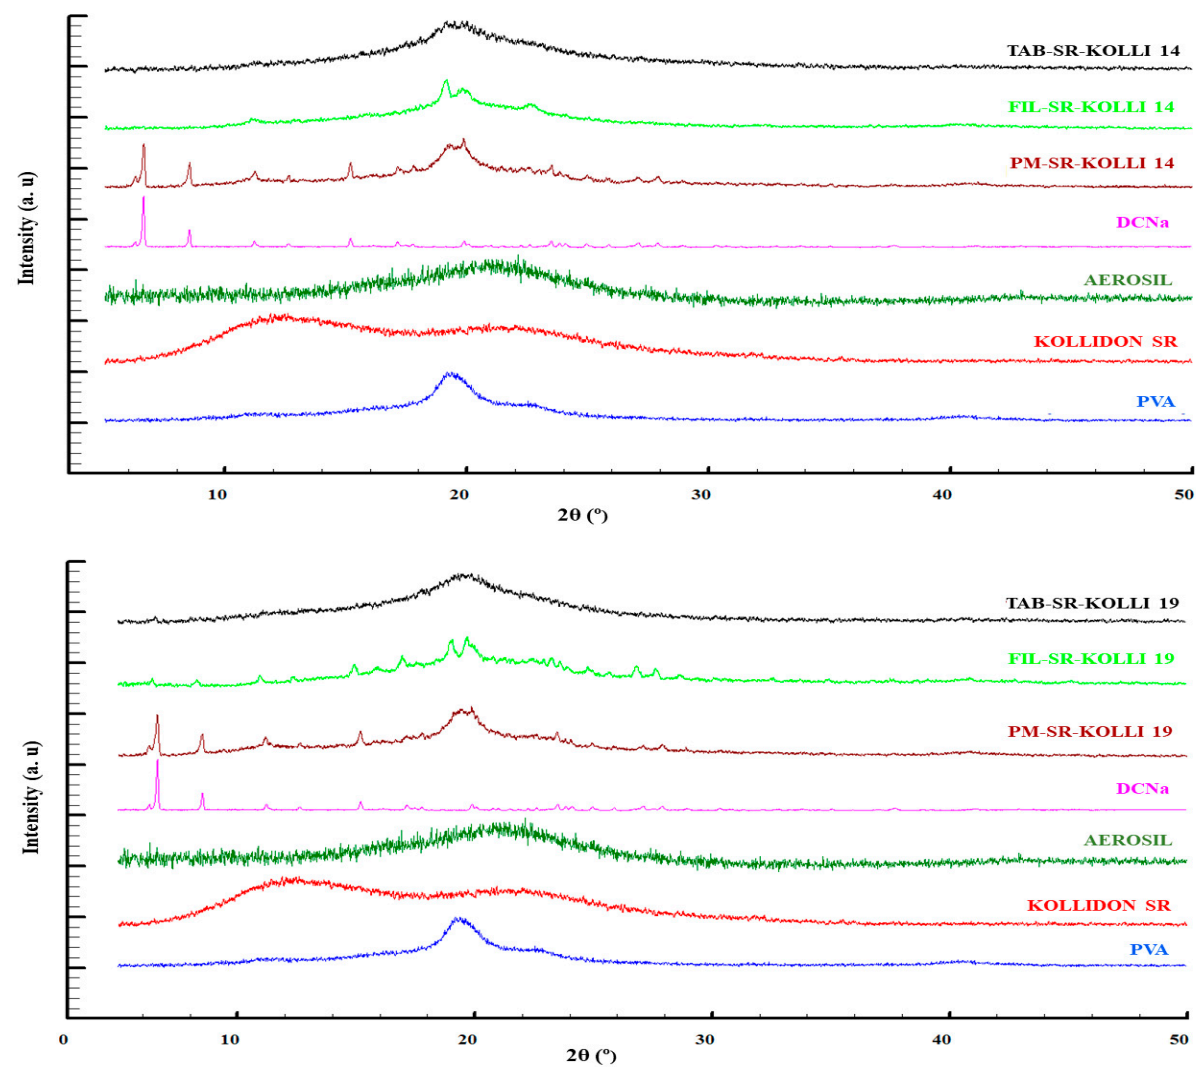

**Figure S7.** XRD diffractograms of materials, physical mixtures, filaments and tablets consisting of combinations of PVA and Kollidon® SR in different ratios as matrix forming polymers.

**Table S1.** Results obtained after fitting the drug release data to different mathematical models.

| Formulation            | Zero order |                            | First order |                           | Higuchi |                              | Baker and Lonsdale |                                            | Hixon and Crowell |                                            | Korsmeyer-Peppas |                            |       |
|------------------------|------------|----------------------------|-------------|---------------------------|---------|------------------------------|--------------------|--------------------------------------------|-------------------|--------------------------------------------|------------------|----------------------------|-------|
|                        | AIC        | k<br>(%min <sup>-1</sup> ) | AIC         | k<br>(min <sup>-1</sup> ) | AIC     | k<br>(%min <sup>-1/2</sup> ) | AIC                | k<br>(% <sup>2/3</sup> min <sup>-1</sup> ) | AIC               | k<br>(% <sup>1/3</sup> min <sup>-1</sup> ) | AIC              | K<br>(%min <sup>-n</sup> ) | n     |
| <b>TAB-SR-PVA</b>      | 66.7       | 0.533                      | 47.3        | 0.0436                    | 57.0    | 7.84                         | 43.2               | 0.0027                                     | 57.3              | 0.0062                                     | 46.2             | 25.00                      | 0.254 |
| <b>TAB-SR-KOLLI 14</b> | 78.2       | 0.350                      | 62.5        | 0.0497                    | 69.7    | 6.39                         | 60.7               | 0.0018                                     | 71.3              | 0.0042                                     | 42.6             | 32.91                      | 0.181 |
| <b>TAB-SR-KOLLI 19</b> | 88.9       | 0.239                      | 75.8        | 0.0494                    | 81.2    | 5.07                         | 72.2               | 0.0023                                     | 83.4              | 0.0030                                     | 50.5             | 37.41                      | 0.134 |
| <b>TAB-SR-KOLLI 24</b> | 110.2      | 0.165                      | 93.5        | 0.0481                    | 101.4   | 4.19                         | 93.5               | 0.0009                                     | 104.0             | 0.0021                                     | 64.5             | 37.35                      | 0.131 |

AIC = Akaike Information Criterion, k = dissolution constant, n = release exponent (indicative of drug release mechanism).
